# Supplementary material for: Real-time monitoring of calcium carbonate and cationic peptide deposition on carboxylate-SAM using a microfluidic SAW biosensor
Source: publisher site journal article supplement (doi:10.3762/bjnano.5.193), 2014-10-22
Supplement: Additional file 1 [file 2190-4286-5-193-S1.pdf]

# Supporting Information File 1

for

## Real-time monitoring of calcium carbonate and cationic peptide deposition on carboxylate-SAM using a microfluidic SAW biosensor

Anna Pohl<sup>1,2</sup> and Ingrid M. Weiss<sup>\*,1</sup>

Address: <sup>1</sup>INM – Leibniz Institute for New Materials, Campus D2 2, 66123 Saarbrücken, Germany and <sup>2</sup>Saarland University, Campus D2 2, 66123 Saarbrücken, Germany

Email: Ingrid M. Weiss - [ingrid.weiss@inm-gmbh.de](mailto:ingrid.weiss@inm-gmbh.de)

\*Corresponding author

### Experimental Details

**Table S1: Sequence of injections on channel 1.** Calcium carbonate interaction with COO-chip.

| Order | Running buffer   | Injection solution                    | Concentration | Volume | Flow rate | Channel |   |   |   | Time between injections |
|-------|------------------|---------------------------------------|---------------|--------|-----------|---------|---|---|---|-------------------------|
|       |                  |                                       |               |        |           | 1       | 2 | 3 | 4 |                         |
| 1.    | H <sub>2</sub> O | CaCO <sub>3</sub> in H <sub>2</sub> O | 17.5 μmol/L   | 400 μL | 40 μL/min | X       |   |   |   | 5 minutes               |
| 2.    | H <sub>2</sub> O | CaCO <sub>3</sub> in H <sub>2</sub> O | 35 μmol/L     | 400 μL | 40 μL/min | X       |   |   |   | 5 minutes               |
| 3.    | H <sub>2</sub> O | CaCO <sub>3</sub> in H <sub>2</sub> O | 70 μmol/L     | 400 μL | 40 μL/min | X       |   |   |   | 5 minutes               |
| 4.    | H <sub>2</sub> O | CaCO <sub>3</sub> in H <sub>2</sub> O | 105 μmol/L    | 400 μL | 40 μL/min | X       |   |   |   | 5 minutes               |
| 5.    | H <sub>2</sub> O | CaCO <sub>3</sub> in H <sub>2</sub> O | 140 μmol/L    | 400 μL | 40 μL/min | X       |   |   |   | 5 minutes               |

**Table S2: Calcium carbonate interaction with COO-SAM sensor chip at different flow rates.** All injections were performed with 140 μmol/L calcium carbonate in pure water.

| Order | Running buffer   | Injection solution                    | Concentration | Volume | Flow rate   | Channel |   |   |   | Time between injections |
|-------|------------------|---------------------------------------|---------------|--------|-------------|---------|---|---|---|-------------------------|
|       |                  |                                       |               |        |             | 1       | 2 | 3 | 4 |                         |
| 1.    | H <sub>2</sub> O | CaCO <sub>3</sub> in H <sub>2</sub> O | 140 μmol/L    | 400 μL | 200 μL/min  | X       |   |   |   | 5 minutes               |
| 2.    | H <sub>2</sub> O | CaCO <sub>3</sub> in H <sub>2</sub> O | 140 μmol/L    | 400 μL | 100 μL/min  | X       |   |   |   | 5 minutes               |
| 3.    | H <sub>2</sub> O | CaCO <sub>3</sub> in H <sub>2</sub> O | 140 μmol/L    | 400 μL | 50 μL/min   | X       |   |   |   | 5 minutes               |
| 4.    | H <sub>2</sub> O | CaCO <sub>3</sub> in H <sub>2</sub> O | 140 μmol/L    | 400 μL | 25 μL/min   | X       |   |   |   | 5 minutes               |
| 5.    | H <sub>2</sub> O | CaCO <sub>3</sub> in H <sub>2</sub> O | 140 μmol/L    | 400 μL | 12.5 μL/min | X       |   |   |   | 5 minutes               |

**Table S3: The running buffer was a 140 μmol/L solution of calcium carbonate in pure water.** Different volumes of citric acid (1 mM) were injected as well as pure water. All experiments were performed on the same channel of the biosensor.

| Order | Running buffer                        | Injection solution | Concentration | Volume | Flow rate | Channel |   |   |   | Time between injections |
|-------|---------------------------------------|--------------------|---------------|--------|-----------|---------|---|---|---|-------------------------|
|       |                                       |                    |               |        |           | 1       | 2 | 3 | 4 |                         |
| 1     | CaCO <sub>3</sub> in H <sub>2</sub> O | Citric acid        | 1 mM          | 100 μL | 50 μL/min | X       |   |   |   | 5 minutes               |
| 2     | CaCO <sub>3</sub> in H <sub>2</sub> O | Citric acid        | 1 mM          | 200 μL | 50 μL/min | X       |   |   |   | 5 minutes               |
| 3     | CaCO <sub>3</sub> in H <sub>2</sub> O | Citric acid        | 1 mM          | 400 μL | 50 μL/min | X       |   |   |   | 5 minutes               |
| 4     | CaCO <sub>3</sub> in H <sub>2</sub> O | Pure water         | -             | 100 μL | 50 μL/min | X       |   |   |   | 5 minutes               |
| 5     | CaCO <sub>3</sub> in H <sub>2</sub> O | Pure water         | -             | 200 μL | 50 μL/min | X       |   |   |   | 5 minutes               |
| 6     | CaCO <sub>3</sub> in H <sub>2</sub> O | Pure water         | -             | 400 μL | 50 μL/min | X       |   |   |   | 5 minutes               |

**Table S4: Experiment with peptides ES9 and AS8 in Gly-Gly buffer at different pH-values.** Exactly the same order was maintained for all experiments performed in Gly-Gly pH 7.75 (channel 2), Gly-Gly pH 8.2 (channel 1) or, Gly-Gly 9.0 (channel 3). Peptide solutions with  $c(\text{ES9})$  or  $c(\text{AS8}) = 200 \mu\text{M}$  in 20 mM Gly-Gly were used.  $c$ , concentration;  $V$ , injection volume;  $\Delta t$ , time interval between injections, for which the microfluidic system was allowed to equilibrate using a Gly-Gly running buffer of the respective pH.

| Order | Running buffer | Injection solution | c [mM] | V [ $\mu\text{L}$ ] | Flow rate [ $\mu\text{L}/\text{min}$ ] | Channel |         |        |   | $\Delta t$ [min] |
|-------|----------------|--------------------|--------|---------------------|----------------------------------------|---------|---------|--------|---|------------------|
|       |                |                    |        |                     |                                        | 1       | 2       | 3      | 4 |                  |
| 1     | Gly-Gly        | EDTA               | 10     | 200                 | 40                                     | pH 8.2  | pH 7.75 | pH 9.0 |   | 5                |
| 2     | Gly-Gly        | Gly-Gly            | 20     | 200                 | 40                                     | pH 8.2  | pH 7.75 | pH 9.0 |   | 2                |
| 3     | Gly-Gly        | EDTA               | 10     | 200                 | 40                                     | pH 8.2  | pH 7.75 | pH 9.0 |   | 5                |
| 4     | Gly-Gly        | ES9                | 0.2    | 200                 | 40                                     | pH 8.2  | pH 7.75 | pH 9.0 |   | 2                |
| 5     | Gly-Gly        | EDTA               | 10     | 200                 | 40                                     | pH 8.2  | pH 7.75 | pH 9.0 |   | 5                |
| 6     | Gly-Gly        | AS8                | 0.2    | 200                 | 40                                     | pH 8.2  | pH 7.75 | pH 9.0 |   | 2                |
