# Supplementary material for: Real-time monitoring of calcium carbonate and cationic peptide deposition on carboxylate-SAM using a microfluidic SAW biosensor
Source: publisher site journal article supplement (doi:10.3762/bjnano.5.193), 2014-10-22
Supplement: Additional file 2 [file 2190-4286-5-193-S2.pdf]

# **Supporting Information File 2**

for

## **Real-time monitoring of calcium carbonate and cationic peptide deposition on carboxylate-SAM using a microfluidic SAW biosensor**

Anna Pohl<sup>1,2</sup> and Ingrid M. Weiss<sup>\*,1</sup>

Address: <sup>1</sup>INM – Leibniz Institute for New Materials, Campus D2 2, 66123 Saarbrücken, Germany and <sup>2</sup>Saarland University, Campus D2 2, 66123 Saarbrücken, Germany

Email: Ingrid M. Weiss - [ingrid.weiss@inm-gmbh.de](mailto:ingrid.weiss@inm-gmbh.de)

\*Corresponding author

**Phase signal calculation using glycerol as reference**

Phase signal derived "normalized mass" calculation experiment by using glycerol injection for compensating solvent viscosity effects. A portion of 5% aqueous glycerol was injected after the equilibration of the system with the running buffer, in this case 140  $\mu\text{mol/L}$  calcium carbonate. Supplementary Figure 1A chronologically shows four citric acid injections, followed by glycerol injection at  $t_g = 4437$  s. The phase and the amplitude signal represent the originally recorded data. The calculated overlay of the four citric acid injections (Suppl Fig. 1A,  $t_1 = 2021$  s;  $t_2 = 2360$  s;  $t_3 = 2699$  s;  $t_4 = 3038$  s) and the glycerol injection (Suppl Fig. 1A,  $t_g = 4437$  s), merged in Suppl. Fig. 1B-E at  $t = 0$  is shown. Suppl. Figures 1B and 1C show the raw phase and amplitude signal of all injections whereby in Suppl. Figures 1D and 1E the calculated signals are presented.

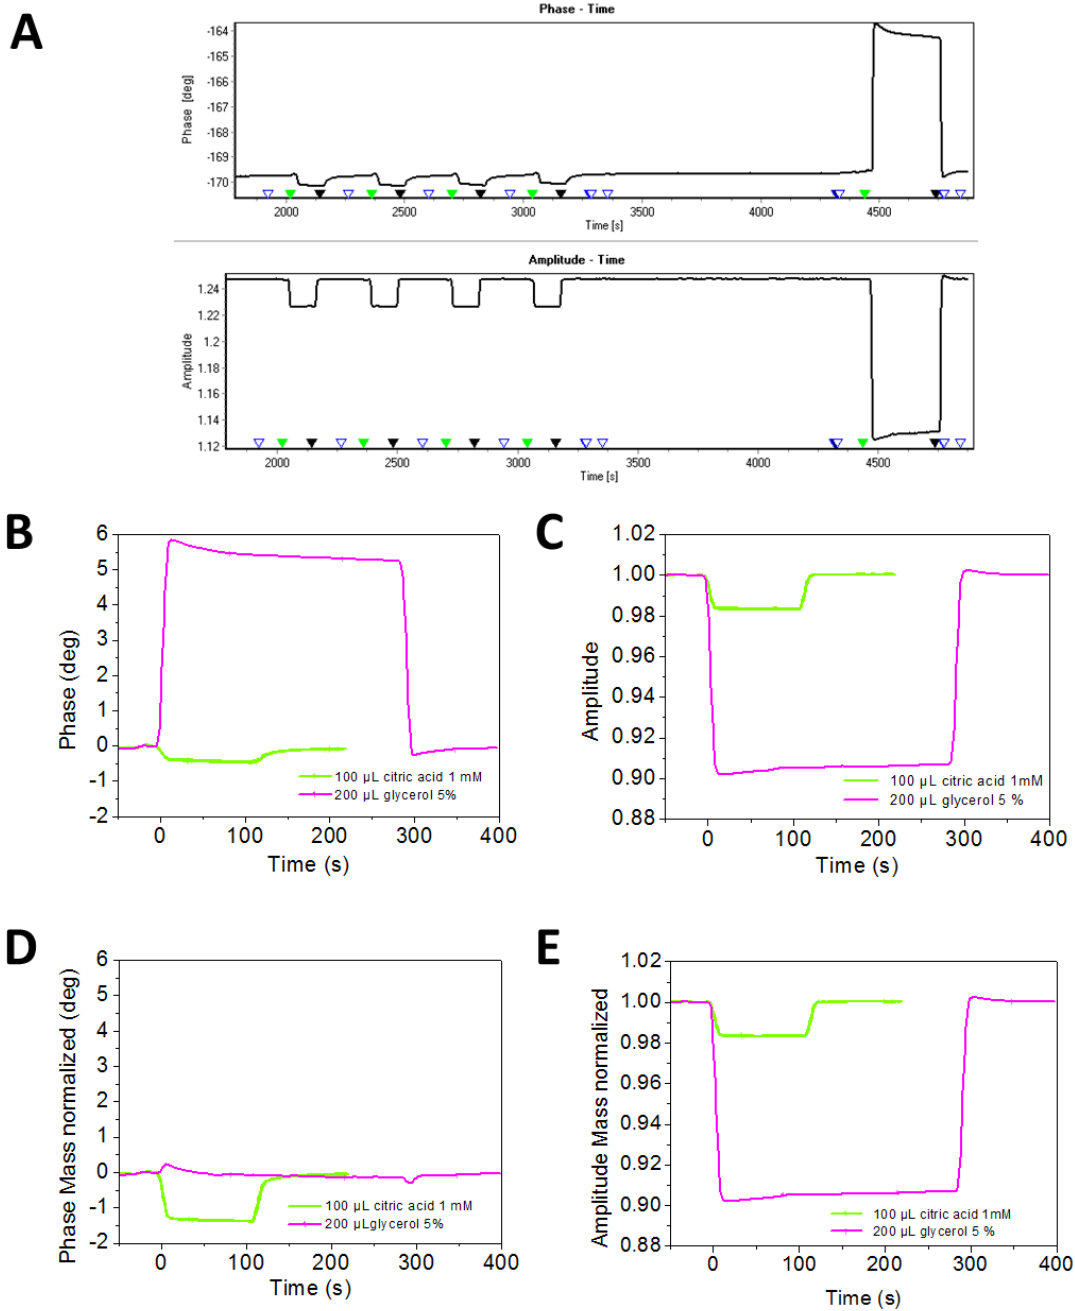

**Figure S1:** Experimental determination of the viscosity effect according to the established glycerol method previously described by the manufacturer. A, Phase and amplitude signal for 4 citric acid injections, followed by a 5% glycerol injection. Note that individual signals from the four citric acid injections cannot be distinguished in the overlay image. B-E, Comparison between the original signals (B,C) and calculated mass normalized phase signal (D) and corresponding amplitude signal (E). The latter is identical with the original amplitude signal (C).
