# Supplementary material for: Real-time monitoring of calcium carbonate and cationic peptide deposition on carboxylate-SAM using a microfluidic SAW biosensor
Source: publisher site journal article supplement (doi:10.3762/bjnano.5.193), 2014-10-22
Supplement: Additional file 3 [file 2190-4286-5-193-S3.pdf]

# Supporting Information File 3

for

## Real-time monitoring of calcium carbonate and cationic peptide deposition on carboxylate-SAM using a microfluidic SAW biosensor

Anna Pohl<sup>1,2</sup> and Ingrid M. Weiss<sup>\*,1</sup>

Address: <sup>1</sup>INM – Leibniz Institute for New Materials, Campus D2 2, 66123 Saarbrücken, Germany and <sup>2</sup>Saarland University, Campus D2 2, 66123 Saarbrücken, Germany

Email: Ingrid M. Weiss - [ingrid.weiss@inm-gmbh.de](mailto:ingrid.weiss@inm-gmbh.de)

\*Corresponding author

**Monitoring cationic peptides ES9 and AS8 on COO-SAM,  
experimental values, Table S5**

Comparative evaluation of the phase signal [°] for the two peptides. The phase signal was continuously recorded for each measurement (3 replicates for each peptide at 3 pH values) and the difference between the phase value at the beginning of the peptide injection ( $t < 0$  s, i.e. "-10 s") and after the peptide injection ( $t = 310$  s) was calculated using the Origin 8.6 software package.

**Table S5: Phase signal difference in [deg] (3 measurements, see e.g. Figure 6).**

| Measurement | Peptide | pH 7.75          | pH 8.2           | pH 9.0           |
|-------------|---------|------------------|------------------|------------------|
| 1           | AS8     | 0.14             | 0.05             | 0.05             |
| 2           | AS8     | 0.30             | 0.41             | 0.19             |
| 3           | AS8     | 0.24             | 0.24             | 0.06             |
| Average     | AS8     | $0.23 \pm 0.082$ | $0.23 \pm 0.182$ | $0.10 \pm 0.077$ |
| 1           | ES9     | 0.09             | 0.04             | 0.05             |
| 2           | ES9     | 0.12             | 0.11             | 0.08             |
| 3           | ES9     | 0.09             | 0.08             | 0.03             |
| Average     | ES9     | $0.10 \pm 0.018$ | $0.08 \pm 0.036$ | $0.05 \pm 0.027$ |
